# Supplementary material for: A Unique Virulence Gene Occupies a Principal Position in Immune Evasion by the Malaria Parasite Plasmodium falciparum
Source: PubMed Central journal article supplement (PMC4437904; doi:10.1371/journal.pgen.1005234), 2015-05-19

Figure S9

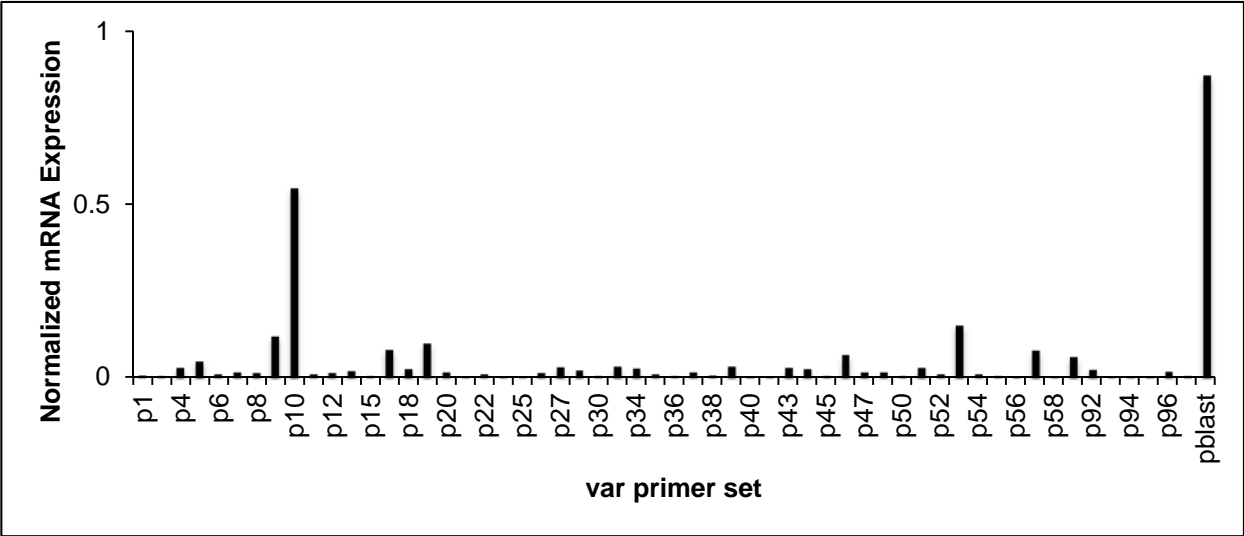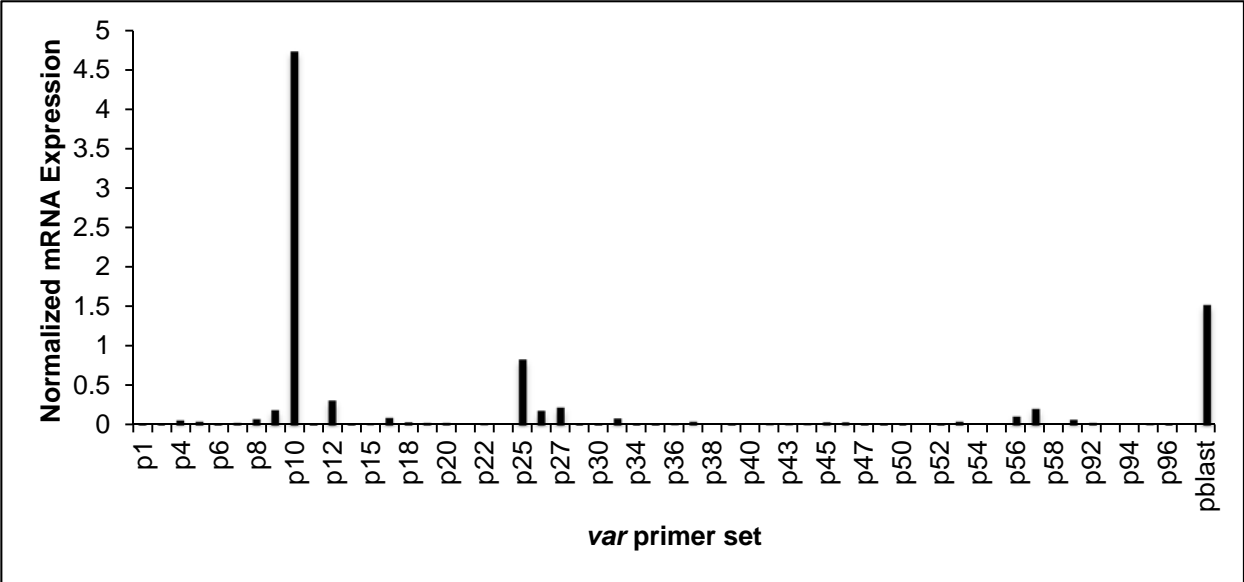

Supplement: pgen.1005234.s009.pdf [file pgen.1005234.s009.pdf]
